# Supplementary material for: A truncated triangular prism constructed by using imidazole–terpyridine building blocks
Source: Royal Society of Chemistry journal article supplement (doi:10.1039/d3dt03217e), 2023-12-01
Supplement: d3dt03217e1.pdf [file d3dt03217e1.pdf]

## Supporting information

### **A truncated triangular prism constructed by using imidazole-terpyridine building blocks**

Yu-Ming Guan<sup>a</sup>, Qixia Bai<sup>a</sup>, Zhe Zhang<sup>a</sup>, Tu Wu<sup>a</sup>, Ting-Zheng Xie<sup>a\*</sup> and Pingshan Wang<sup>a\*</sup>

## Table of Content

|                                                    |    |
|----------------------------------------------------|----|
| 1. Supplemental Experimental Procedures.....       | 3  |
| 2. Synthesis of compounds and supramolecules ..... | 5  |
| 3. NMR Spectra .....                               | 9  |
| 4. ESI-MS Spectra .....                            | 19 |
| 5. Fluorescence emission measurement.....          | 24 |
| 6. References.....                                 | 27 |

## 1. Supplemental Experimental Procedures

**General Procedures.** Reagents and solvents were purchased from Energy Chemical, Bidepharm, and used without purification. Thin-layer chromatography (TLC) was performed on flexible sheets (Greagent) precoated with  $\text{Al}_2\text{O}_3$  (IB-F) and  $\text{SiO}_2$  (IB2-F) and visualized by UV light. Column chromatography was conducted using neutral  $\text{Al}_2\text{O}_3$  (200-300 mesh).  $^1\text{H}$ ,  $^{13}\text{C}$ , 2D COSY, 2D  $^1\text{H}$ - $^1\text{H}$  NOESY NMR, and 2D DOSY NMR spectra were recorded on a Bruker NMR 400, 500 MHz. Different NMR solvents were purchased from J&K Scientific and Sigma/Aldrich. ESI-MS and TWIM-MS were recorded with a Waters Synapt G Si tandem mass spectrometer, using solutions of 0.01 mg sample in 1 mL of  $\text{CHCl}_3/\text{CH}_3\text{OH}$  (1:3, v/v) for ligands or 0.5 mg sample in 1 mL of  $\text{MeCN}/\text{MeOH}$  (3:1, v/v) for complexes and 0.5 mg sample in 1 mL of  $\text{DMF}/\text{MeCN}$  (3:1, v/v) for.

**TWIM-MS.** The TWIM-MS experiments were performed under the following conditions: ESI capillary voltage, 2 kV; sample cone voltage, 35 V; Source Offset, 42V; source temperature 150 °C; desolvation temperature, 250 °C; cone gas flow, 10 L/h; desolvation gas flow, 700 L/h ( $\text{N}_2$ ); source gas flow, 0 mL/min; trap gas flow, 3 mL/min; helium cell gas flow, 120 mL/min; ion mobility (IM) cell gas flow, 30 mL/min; sample flow rate, 8  $\mu\text{L}/\text{min}$ ; IM traveling wave height, 25 V; and IM traveling wave velocity, 1200 m/s. Q was set in rf-only mode to transmit all ions produced by ESI into the triwave region for the acquisition of TWIM-MS data. Data were collected and analyzed by using Mass Lynx 4.2 and Drift Scope 2.9.<sup>1</sup>

**Molecular Modeling.** Energy minimization of the macrocycles was conducted with the Materials Studio version 6.0 program, using the Anneal and Geometry Optimization tasks in the Forcite module (Accelrys Software, Inc.). The counterions were omitted. Geometry optimization used a universal forcefield with atom-based summation and cubic spline truncation for both the electrostatic and van der Waals parameters.

**TEM.** Transmission electron microscopy tests were performed on the JEOL JEM-2100F equipment. The sample solutions were drop-casted onto a lacey carbon-covered Cu grid (300 mesh, purchased from Beijing Zhongjingkeyi Technology Co., Ltd.) and the extra solution was absorbed by filter paper to avoid aggregation.

**FL.** Fluorescence properties were performed on Edinburgh-FS5 Fluorescence spectrometer at 298 K ( $10^{-6}$  M  $\text{CHCl}_3$  or  $\text{CH}_3\text{CN}$ )

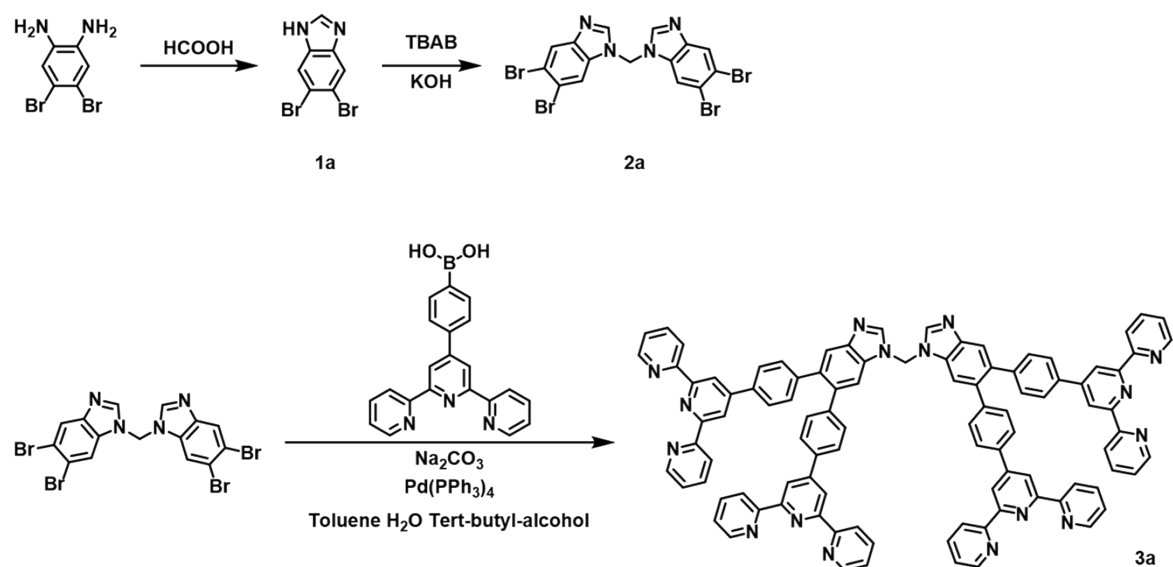

**Scheme S1.** Synthesis route of **L**.

## 2. Synthesis of compounds and supramolecules

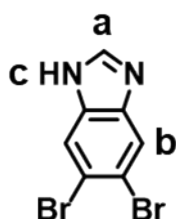

**Synthesis of 5,6-dibromo-1H-benzo[d]imidazole (1a):** In a 100 mL three-necked flask, 4,5-dibromo-o-phenylenediamine (3.3 g, 12.5 mmol) was added, 33 mL formic acid was added under the protection of  $N_2$ , and refluxed at  $110^\circ C$  for 4 h. After the reaction cool to room temperature, and then slowly add 4 mol/L of sodium hydroxide solution under stirring condition to adjust  $pH = 7$ . The filtration results **1a** in a yellow-white solid (3.0 g, 88 %).

$^1H$  NMR (500 MHz,  $DMSO-d_6$ , 298 K, ppm)  $\delta$  12.70 (s, 1H,  $H^a$ ), 8.32 (s, 1H,  $H^b$ ), 8.03 (s, 2H,  $H^c$ ).  $^{13}C$  NMR (101 MHz,  $DMSO-d_6$ , 298 K, ppm)  $\delta$  144.61 (s), 115.99 (s).

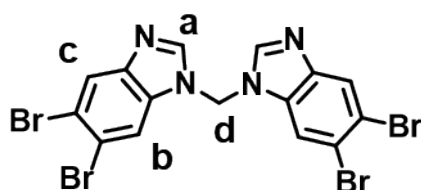

**Synthesis of bis(5,6-dibromo-1*H*-benzo[*d*]imidazol-1-yl)methane (2a):** **1a** (552 mg, 2 mmol), potassium hydroxide (224 mg, 4 mmol) and tetrabutylammonium bromide (19.3 mg, 0.06 mmol) were added to a 50 mL single-necked flask and stirred for 30 min at room temperature. Then 10 mL dibromide was added and stirred for 12 h at room temperature. Stop stirring and add dichloromethane, filter to get a white solid, and then wash with deionized water and methanol. Gain the result **2a**, which is pale solid (500 mg, 89 %).

<sup>1</sup>H NMR (400 MHz, CDCl<sub>3</sub>/CD<sub>3</sub>OD (10:1, v/v) 298 K, ppm) δ 8.24 (s, 2H, H<sup>a</sup>), 7.94 (s, 2H, Ph-H<sup>b</sup>), 7.80 (s, 2H, Ph-H<sup>c</sup>), 6.48 (s, 2H, H<sup>d</sup>). <sup>13</sup>C NMR (101 MHz, DMSO-*d*<sub>6</sub> 298 K, ppm) δ 146.94 (s), 144.42 (s), 133.52 (s), 124.70 (s), 117.93 (d, *J* = 69.9 Hz), 115.98 (s), 81.20 – 76.56 (m), 53.10 (s). ESI-TOF (*m/z*): Calcd. for [C<sub>15</sub>H<sub>9</sub>Br<sub>4</sub>N<sub>4</sub>]<sup>+</sup>: 564.9046. Found:564.9046.

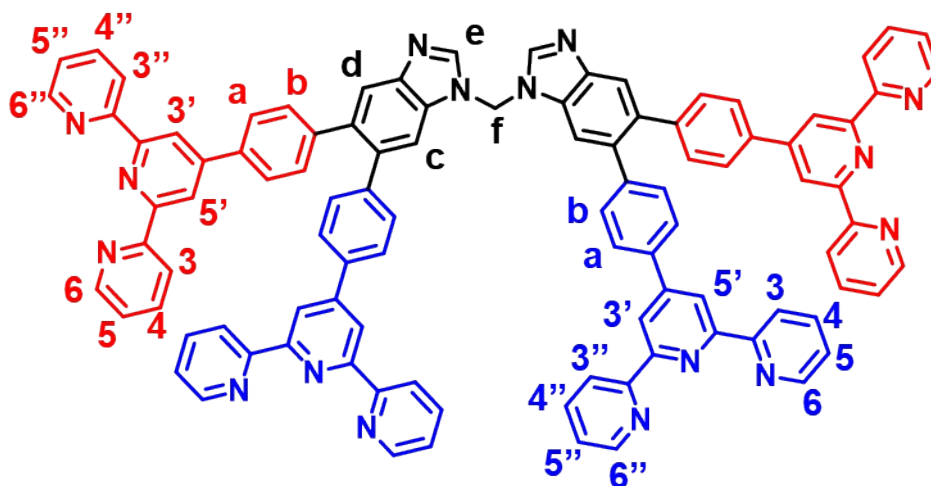

**Synthesis of bis(5,6-bis(4-([2,2':6',2''-terpyridin]-4'-yl)phenyl)-1*H*-benzo[*d*]imidazol-1-yl)methane (L):** The mixture of **2a** (1.10 g, 0.99 mmol), 4'-(4-boronatophenyl)-2,2':6',2''-terpyridine (2.25 g, 6.36 mmol), Na<sub>2</sub>CO<sub>3</sub> (0.90 g, 8.48 mmol), and Pd(PPh<sub>3</sub>)<sub>4</sub> (0.25 g, 0.21 mmol) in the solution of toluene (80 mL), tert-butyl-alcohol (15 mL) and H<sub>2</sub>O (30 mL) was refluxing for 96 h under N<sub>2</sub>. After separating the toluene layer, the aqueous layer was extracted with CH<sub>2</sub>Cl<sub>2</sub> (150 mL). The combined organic layers were washed with brine, dried over anhydrous Na<sub>2</sub>SO<sub>4</sub> and concentrated *in vacuo*. The residue was column chromatographed eluting with a mixture of CH<sub>2</sub>Cl<sub>2</sub> and MeOH (100:1, v/v) to give **L** (1.16 g, 58%), as a white powder.

$^1\text{H}$  NMR (400 MHz,  $\text{CDCl}_3$  298 K, ppm)  $\delta$  8.72 (s, 4H, tpy-H $^{3',5'}$ ), 8.68 – 8.64 (m, 4H, tpy-H $^{6,6''}$ ), 8.62 (t,  $J = 4.0$  Hz, 8H, tpy-H $^{3',5'}$ , tpy-H $^{3,3''}$ ), 8.57 (dd,  $J = 4.5, 0.7$  Hz, 4H, tpy-H $^{6,6''}$ ), 8.51 (d,  $J = 8.0$  Hz, 4H, tpy-H $^{3,3''}$ ), 8.28 (s, 2H, H $^e$ ), 7.98 (s, 2H, H $^d$ ), 7.79 (dddd,  $J = 17.0, 15.5, 8.0, 2.0$  Hz, 16H, tpy-H $^{4,4''}$ , H $^a$ , tpy-H $^{4,4''}$ , H $^a$ ), 7.70 (s, 2H, H $^c$ ), 7.34 (d,  $J = 8.5$  Hz, 4H, H $^b$ ), 7.32 – 7.27 (m, 8H, tpy-H $^{5,5''}$ , H $^b$ ), 7.20 (ddd,  $J = 7.5, 5.0, 1.0$  Hz, 4H, H $^{5,5''}$ ), 6.64 (s, 2H, H $^f$ ).

$^{13}\text{C}$  NMR (101 MHz,  $\text{CDCl}_3$  298 K, ppm)  $\delta$  156.30 (s), 156.08 (s), 155.88 (s), 155.66 (s), 149.71 (s), 149.45 (s), 149.05 (d,  $J = 13.0$  Hz), 143.68 (s), 142.23 (d,  $J = 8.5$  Hz), 137.21 (s), 137.02 – 136.27 (m), 132.57 (s), 130.74 (d,  $J = 9.5$  Hz), 127.14 (d,  $J = 14.0$  Hz), 123.68 (d,  $J = 13.5$  Hz), 122.84 (s), 121.28 (d,  $J = 13.0$  Hz), 118.81 (d,  $J = 6.0$  Hz), 111.19 (s). ESI-TOF ( $m/z$ ): Calcd. for  $[\text{C}_{99}\text{H}_{66}\text{N}_{16}]^+$ : 1479.0974. Found: 1479.0974.

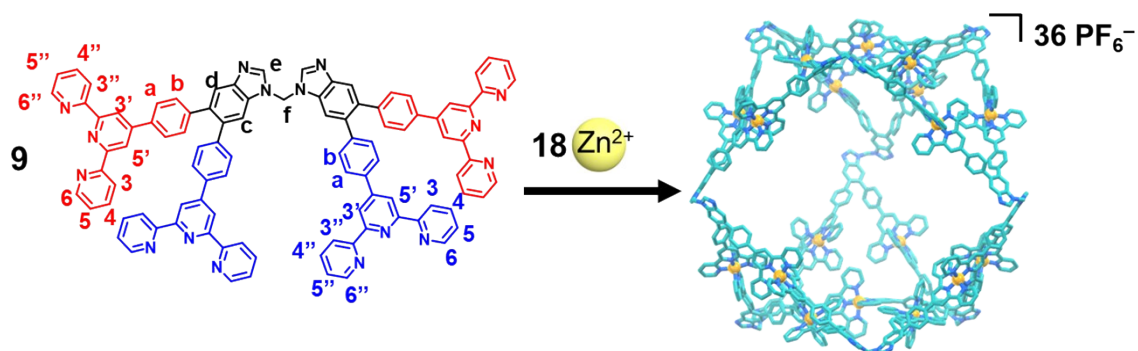

**Complex G(PF $_6^-$ ):** To a solution of L (10.4 mg, 7  $\mu\text{mol}$ ) in  $\text{CHCl}_3$  and MeOH (1:1.5, 12 mL), a solution of  $\text{Zn}(\text{NO}_3)_2 \cdot 6\text{H}_2\text{O}$  (4.2 mg, 14  $\mu\text{mol}$ ) in MeOH (2 mL) was added. The mixture was stirred at 55°C for 8 h and then cooled to room temperature. Upon addition of excess  $\text{NH}_4\text{PF}_6$  (87.31 mg), a precipitate was formed and washed with water and MeOH three times respectively, dried *in vacuo* to give complex G(PF $_6^-$ ) (14.9 mg, 97 %) as a yellow solid.

$^1\text{H}$  NMR (400 MHz,  $\text{DMSO}-d_6$  298 K, ppm)  $\delta$  9.79-9.28 (br, 36H, tpy-H $^{3',5'}$ ), 9.28-8.80 (m, 90H, tpy-H $^{3',5'}$ , tpy-H $^{3,3''}$ , H $^e$ ), 8.78-8.41 (m, 54H, tpy-H $^{3,3''}$ , H $^f$ ), 8.40-8.13 (m, 126H, tpy-H $^{4,4''}$ , tpy-H $^{6,6''}$ , H $^d$ , H $^a$ ), 8.10-7.69 (m, 162H, tpy-H $^{4,4''}$ , tpy-H $^{6,6''}$ , tpy-H $^{5,5''}$ , H $^c$ , H $^a$ ), 7.67-7.46 (br, 36H, H $^b$ ), 7.45-6.77 (m, 54H, tpy-H $^{5,5''}$ , H $^b$ ).

ESI-MS( $m/z$ ): 2316.38  $[\text{M}-\text{Zn}(\text{PF}_6)_2-8\text{PF}_6]^{8+}$  (calcd  $m/z$ : 2316.91), 2042.73  $[\text{M}-\text{Zn}(\text{PF}_6)_2-9\text{PF}_6]^{9+}$  (calcd  $m/z$ : 2043.37), 1823.99  $[\text{M}-\text{Zn}(\text{PF}_6)_2-10\text{PF}_6]^{10+}$  (calcd  $m/z$ : 1824.54), 1645.08  $[\text{M}-\text{Zn}(\text{PF}_6)_2-11\text{PF}_6]^{11+}$  (calcd  $m/z$ : 1645.49), 1495.87  $[\text{M}-\text{Zn}(\text{PF}_6)_2-12\text{PF}_6]^{12+}$

(calcd m/z: 1496.29), 1369.68 [M-Zn(PF<sub>6</sub>)<sub>2</sub>-13PF<sub>6</sub>]<sup>13+</sup> (calcd m/z: 1370.04), 1261.58 [M-Zn(PF<sub>6</sub>)<sub>2</sub>-14PF<sub>6</sub>]<sup>14+</sup> (calcd m/z: 1261.83), 1167.74 [M-Zn(PF<sub>6</sub>)<sub>2</sub>-15PF<sub>6</sub>]<sup>15+</sup> (calcd m/z: 1168.04), 1085.68 [M-Zn(PF<sub>6</sub>)<sub>2</sub>-16PF<sub>6</sub>]<sup>16+</sup> (calcd m/z: 1085.98), 1013.33 [M-Zn(PF<sub>6</sub>)<sub>2</sub>-17PF<sub>6</sub>]<sup>17+</sup> (calcd m/z: 1013.57), 949.01 [M-Zn(PF<sub>6</sub>)<sub>2</sub>-18PF<sub>6</sub>]<sup>18+</sup> (calcd m/z: 949.21), 891.49 [M-Zn(PF<sub>6</sub>)<sub>2</sub>-19PF<sub>6</sub>]<sup>8+</sup> (calcd m/z: 891.62).

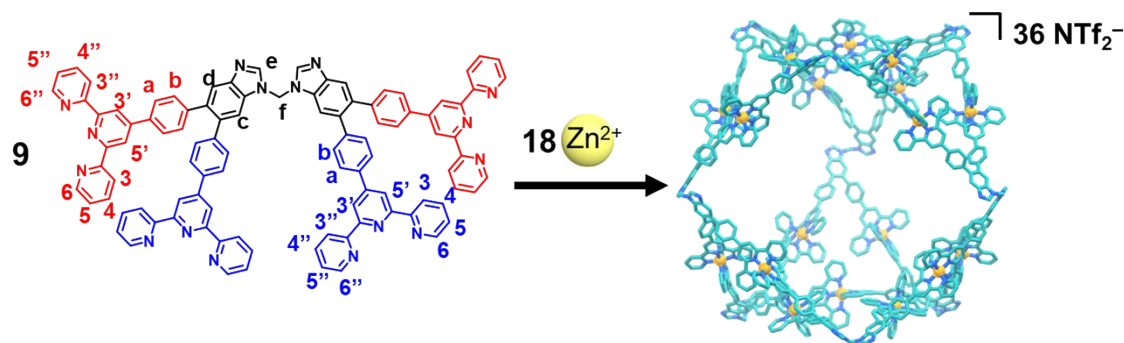

**Complex G(NTf<sub>2</sub><sup>-</sup>).**: To a solution of **L** (10.0 mg, 7 μmol) in CHCl<sub>3</sub> and MeOH (1:1.5, 12 mL), a solution of Zn(NO<sub>3</sub>)<sub>2</sub>·6H<sub>2</sub>O (4.2 mg, 14 μmol) in MeOH (2 mL) was added. The mixture was stirred at 55°C for 8 h and then cooled to room temperature. Upon addition of excess LiNTf<sub>2</sub> (90.34 mg), a precipitate was formed and washed with water and MeOH three times respectively, dried *in vacuo* to give complex **G(NTf<sub>2</sub><sup>-</sup>)** (14.8 mg, 95 %) as a yellow solid.

<sup>1</sup>H NMR (400 MHz, CD<sub>3</sub>CN 298 K, ppm) δ 9.15-8.92 (br, 72H, tpy-H<sup>3',5'</sup>, tpy-H<sup>3',5'</sup>), 8.81 (m, 18H, H<sup>e</sup>), 8.73-8.58 (m, 72H, tpy-H<sup>3,3''</sup>, tpy-H<sup>3,3''</sup>), 8.18-7.98 (m, 162H, tpy-H<sup>4,4''</sup>, tpy-H<sup>4,4''</sup>, H<sup>d</sup>, H<sup>a</sup>, H<sup>a</sup>), 7.85-7.66 (m, 90H, tpy-H<sup>6,6''</sup>, tpy-H<sup>6,6''</sup>, H<sup>c</sup>), 7.67-7.48 (br, 108H, tpy-H<sup>5,5''</sup>, H<sup>b</sup>, H<sup>b</sup>), 7.39-7.23 (m, 36H, tpy-H<sup>5,5''</sup>), 7.06-6.79 (m, 18H, H<sup>f</sup>).

ESI-MS(m/z): 2449.05 [M-Zn(NTf<sub>2</sub>)<sub>2</sub>-9NTf<sub>2</sub>]<sup>9+</sup> (calcd m/z: 2448.87), 2176.23 [M-Zn(NTf<sub>2</sub>)<sub>2</sub>-10 NTf<sub>2</sub>]<sup>10+</sup> (calcd m/z: 2175.97), 1952.86 [M-Zn(NTf<sub>2</sub>)<sub>2</sub>-11 NTf<sub>2</sub>]<sup>11+</sup> (calcd m/z: 1952.69), 1766.78 [M-Zn(NTf<sub>2</sub>)<sub>2</sub>-12 NTf<sub>2</sub>]<sup>12+</sup> (calcd m/z: 1766.62), 1609.42 [M-Zn(NTf<sub>2</sub>)<sub>2</sub>-13 NTf<sub>2</sub>]<sup>13+</sup> (calcd m/z: 1609.18), 1474.32 [M-Zn(NTf<sub>2</sub>)<sub>2</sub>-14NTf<sub>2</sub>]<sup>14+</sup> (calcd m/z: 1474.22), 1357.45 [M-Zn(NTf<sub>2</sub>)<sub>2</sub>-15NTf<sub>2</sub>]<sup>15+</sup> (calcd m/z: 1357.27), 1255.17 [M-Zn(NTf<sub>2</sub>)<sub>2</sub>-16 NTf<sub>2</sub>]<sup>16+</sup> (calcd m/z: 1254.93), 1164.69 [M-Zn(NTf<sub>2</sub>)<sub>2</sub>-17NTf<sub>2</sub>]<sup>17+</sup> (calcd m/z: 1164.63), 1084.32 [M-Zn(NTf<sub>2</sub>)<sub>2</sub>-18 NTf<sub>2</sub>]<sup>18+</sup> (calcd m/z: 1084.37).



### 3. NMR Spectra

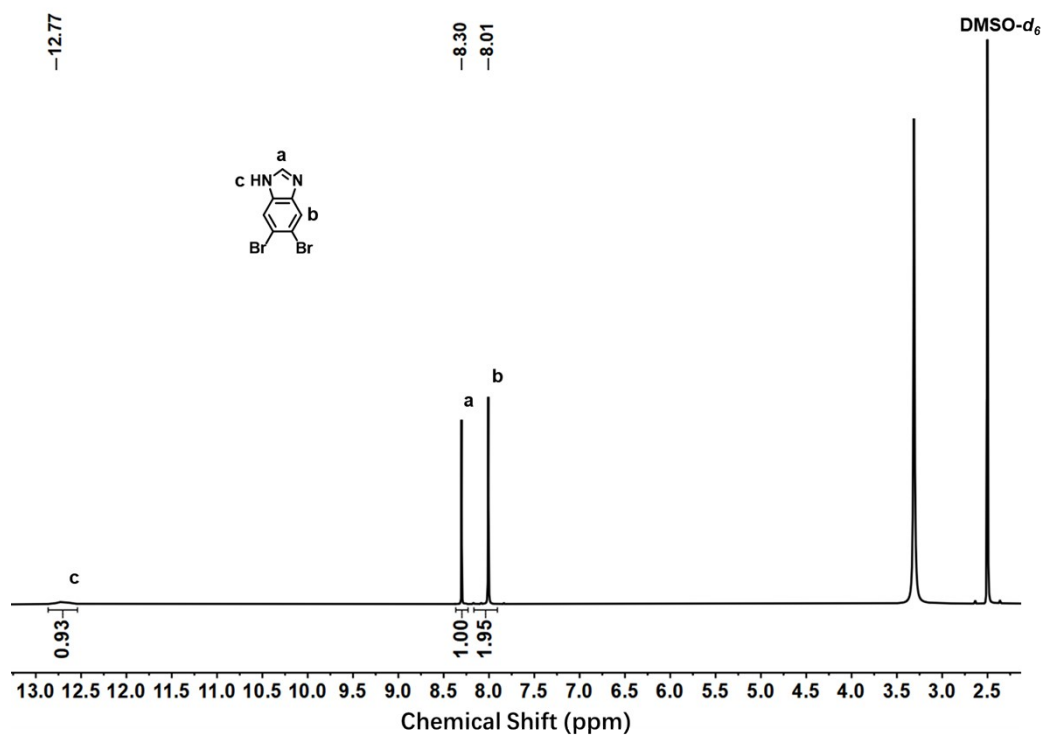

Figure S1.  $^1\text{H}$  NMR (400 MHz, 298 K) spectrum of **1a** in  $\text{DMSO-}d_6$

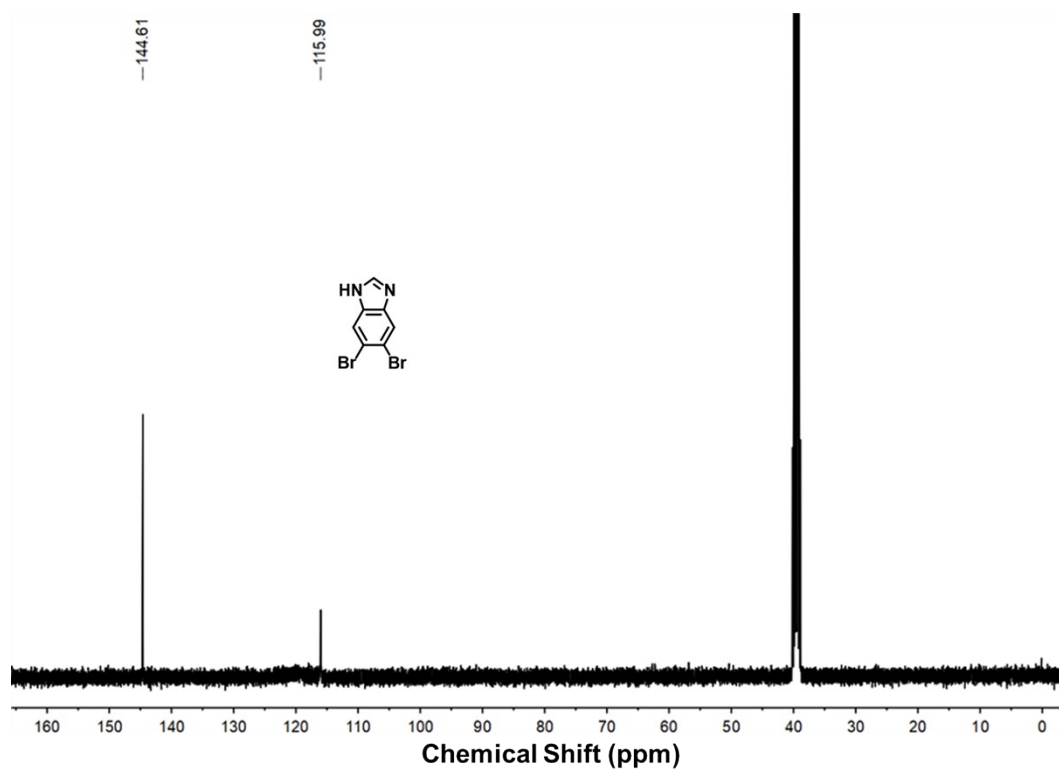

Figure S2.  $^{13}\text{C}$  NMR (101 MHz, 298 K) spectrum of **1a** in  $\text{DMSO-}d_6$

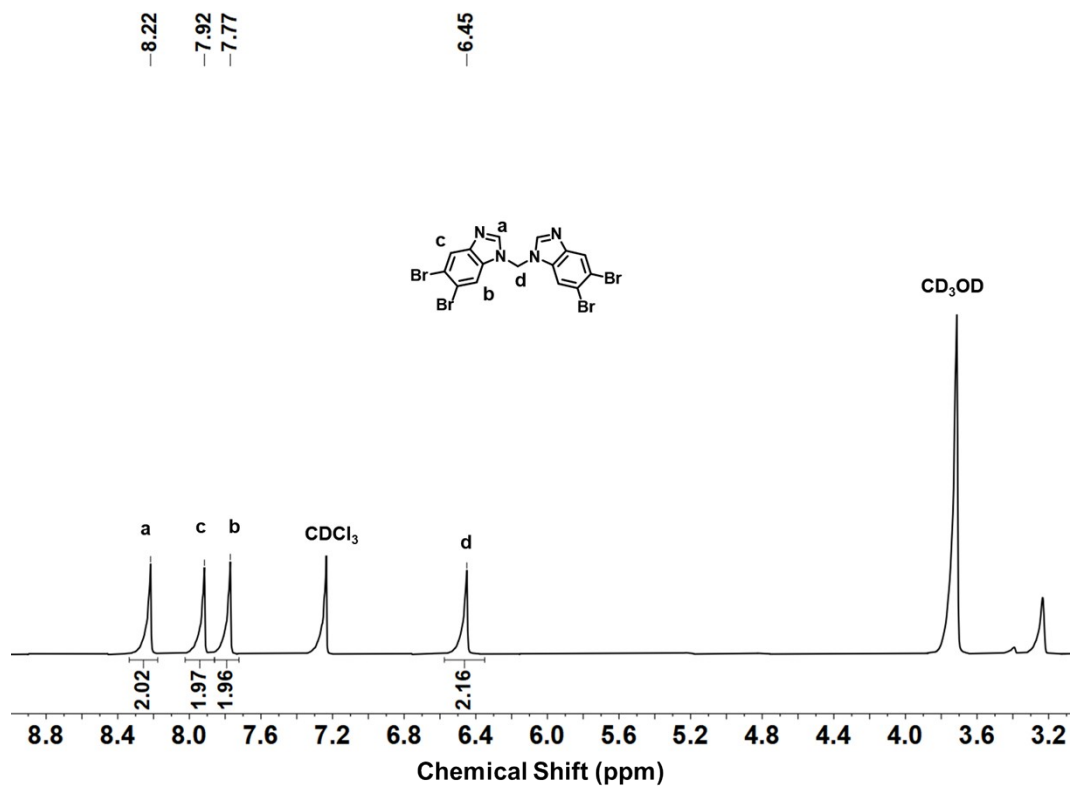

Figure S3. <sup>1</sup>H NMR (400 MHz, 298 K) spectrum of **2a** in CDCl<sub>3</sub>/CD<sub>3</sub>OD (10:1, v/v)

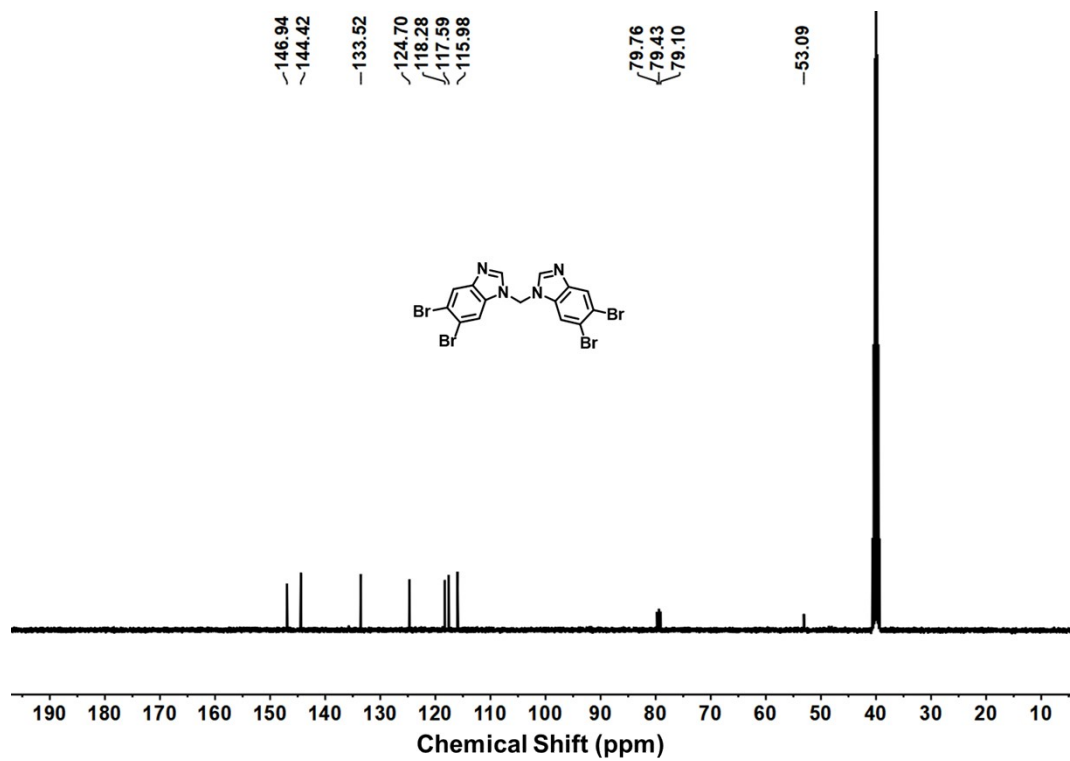

Figure S4. <sup>13</sup>C NMR (101 MHz, 298 K) spectrum of **2a** in DMSO-*d*<sub>6</sub>

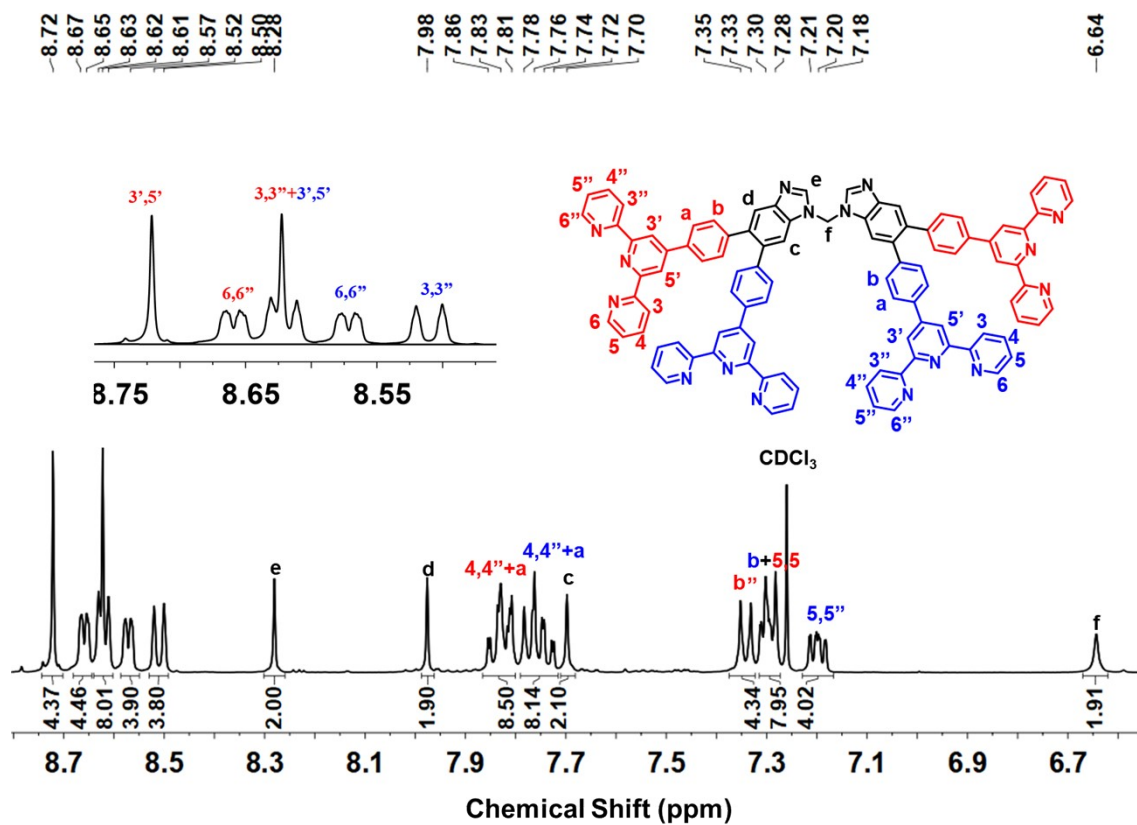

Figure S5.  $^1\text{H}$  NMR (400 MHz, 298 K) spectrum of L in  $\text{CDCl}_3$

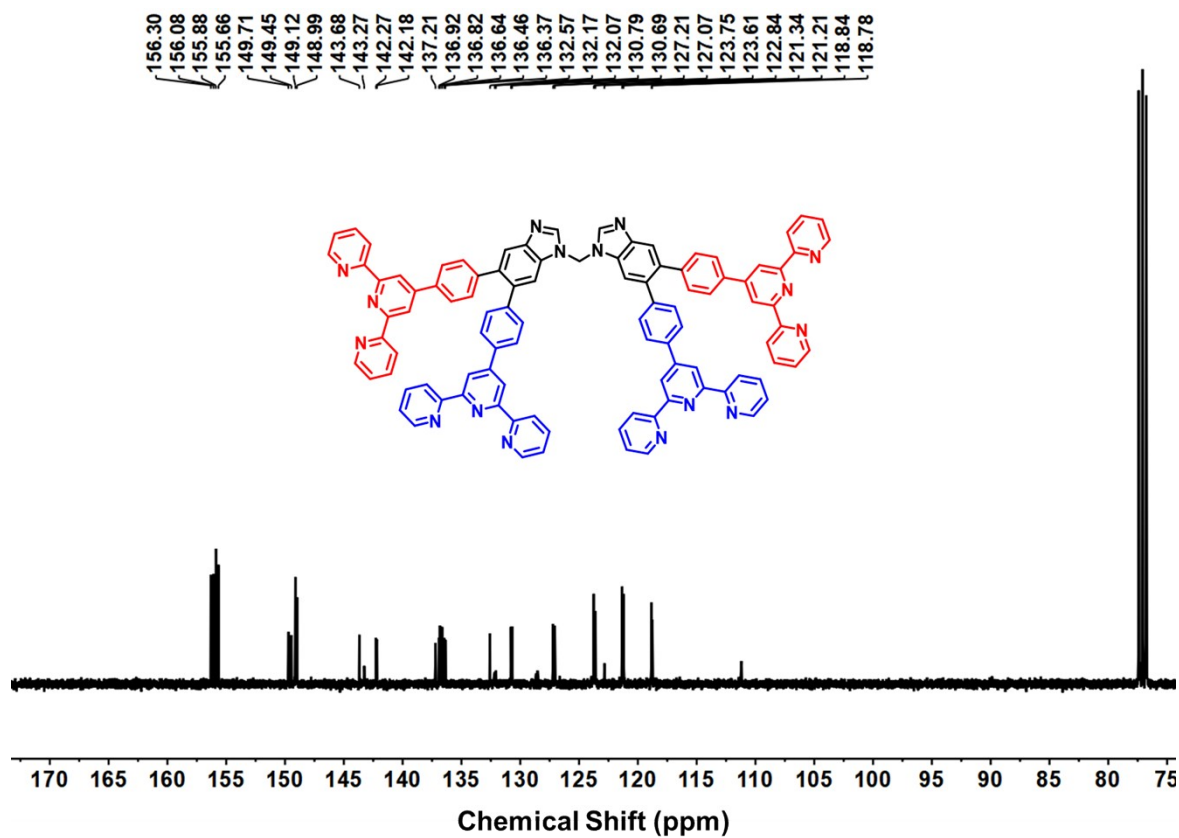

Figure S6.  $^{13}\text{C}$  NMR (101 MHz, 298 K) spectrum of L in  $\text{CDCl}_3$



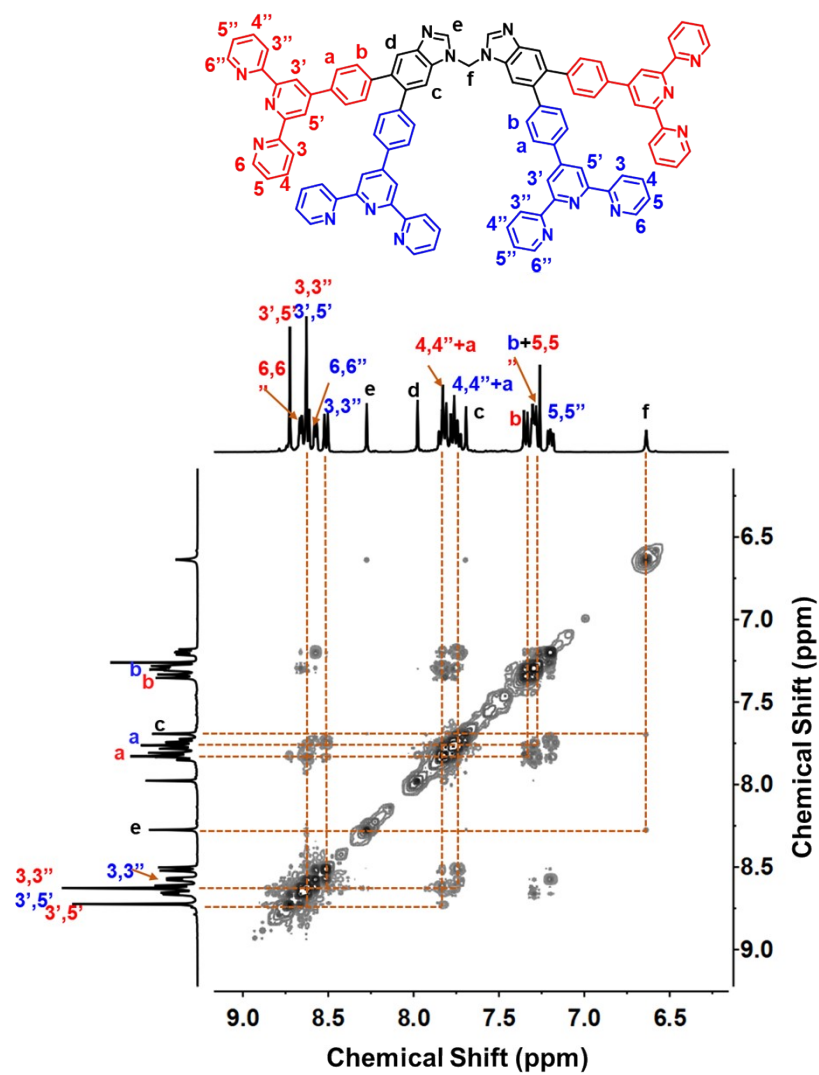

**Figure S8.** 2D  $^1\text{H}$ - $^1\text{H}$  NOESY NMR (500 MHz, 298 K) spectrum of **L** in  $\text{CDCl}_3$  (aromatic region)

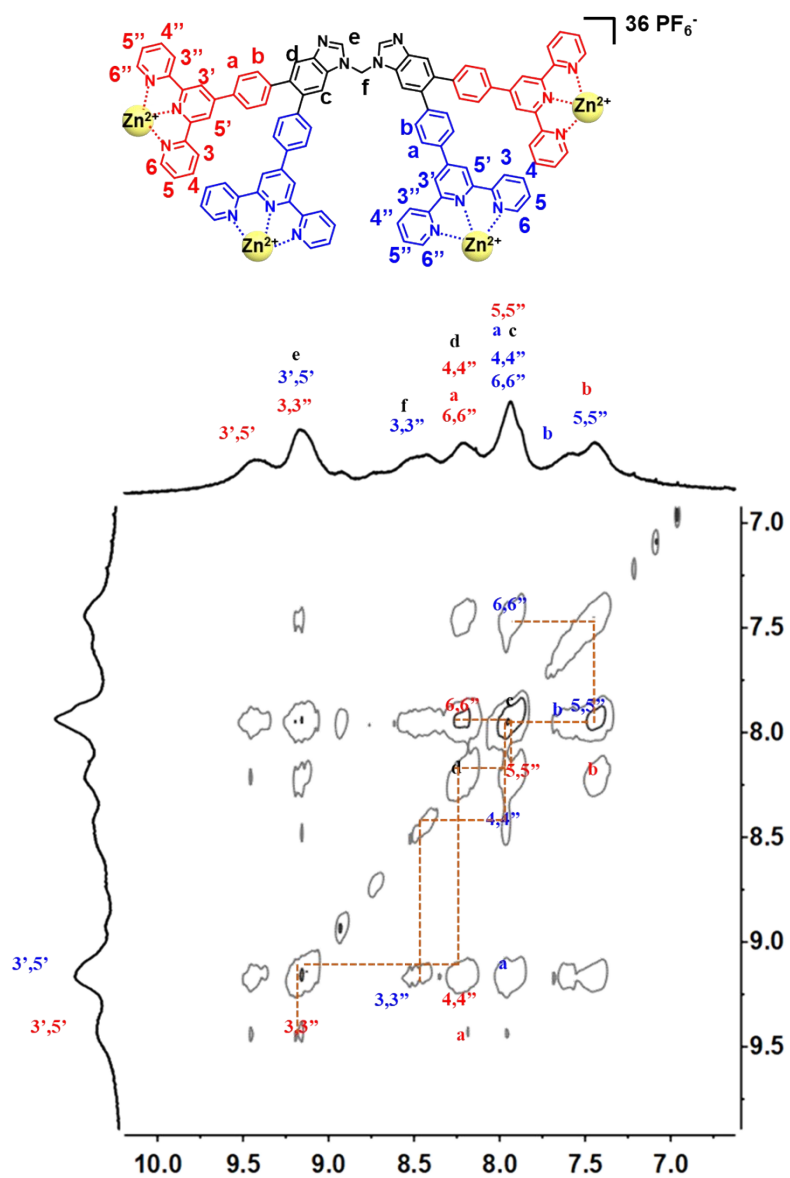

**Figure S9.** 2D <sup>1</sup>H-<sup>1</sup>H NOESY NMR (500 MHz, 298 K) spectrum of **Supramolecular G(PF<sub>6</sub><sup>-</sup>)** in DMSO-*d*<sub>6</sub> (aromatic region)

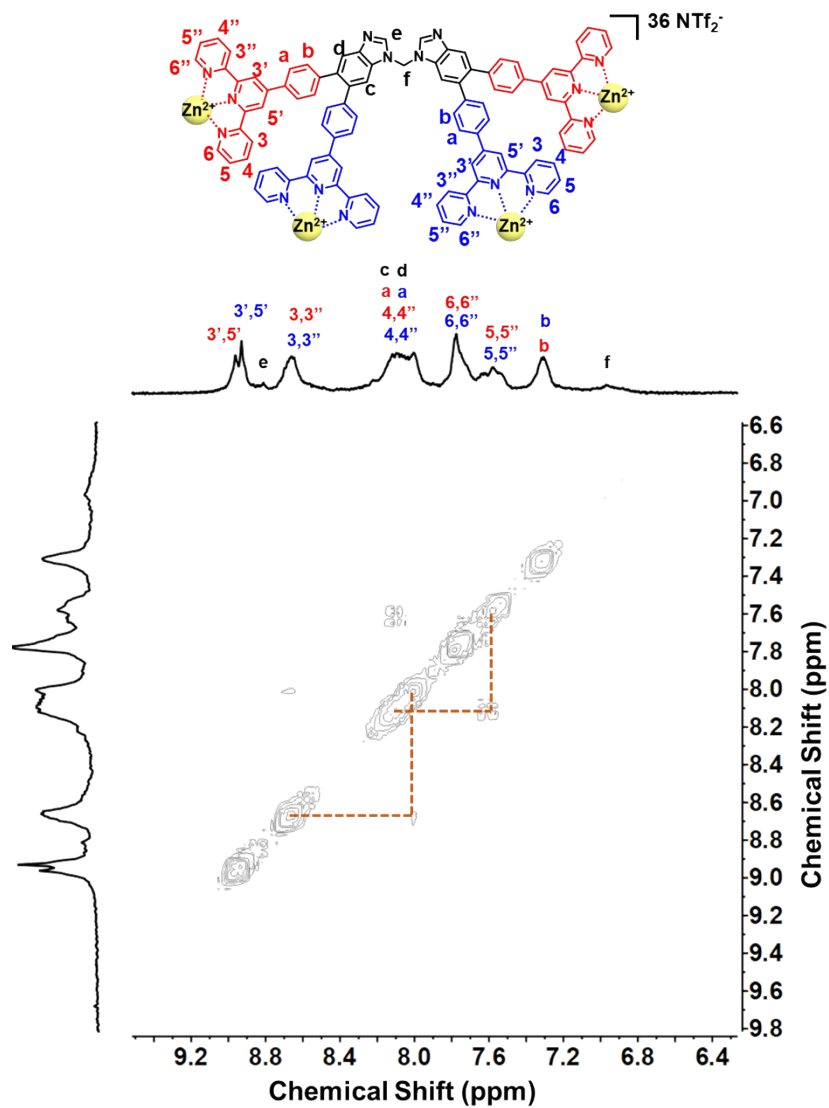

**Figure S10.** 2D  $^1\text{H}$ - $^1\text{H}$  COSY NMR (500 MHz, 298 K) spectrum of **Supramolecular G(NTF<sub>2</sub><sup>-</sup>)** in CD<sub>3</sub>CN (aromatic region)

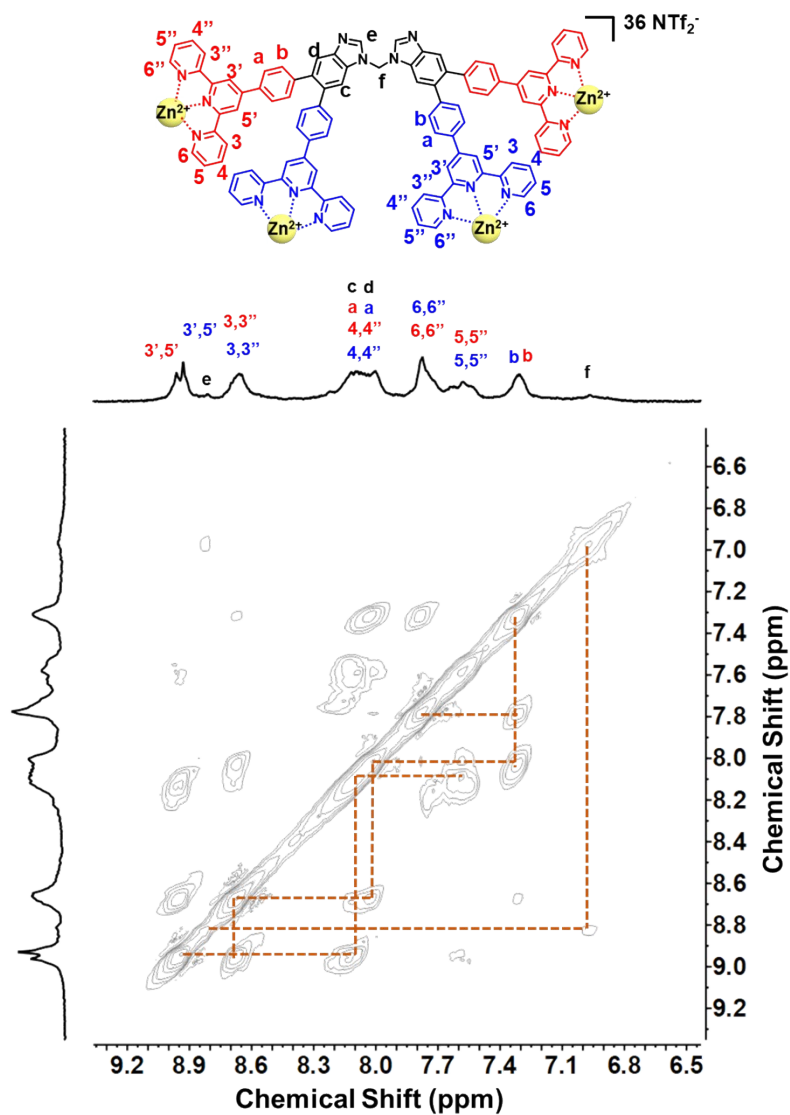

**Figure S11.** 2D  $^1\text{H}$ - $^1\text{H}$  NOESY NMR (500 MHz, 298 K) spectrum of **Supramolecular G(NTf<sub>2</sub><sup>-</sup>)** in CD<sub>3</sub>CN (aromatic region)

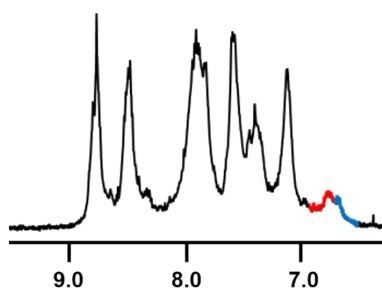

**Figure S12.**  $^1\text{H}$  NMR spectra of supramolecular **G[NTf<sub>2</sub><sup>-</sup>]** at 333.15 K.



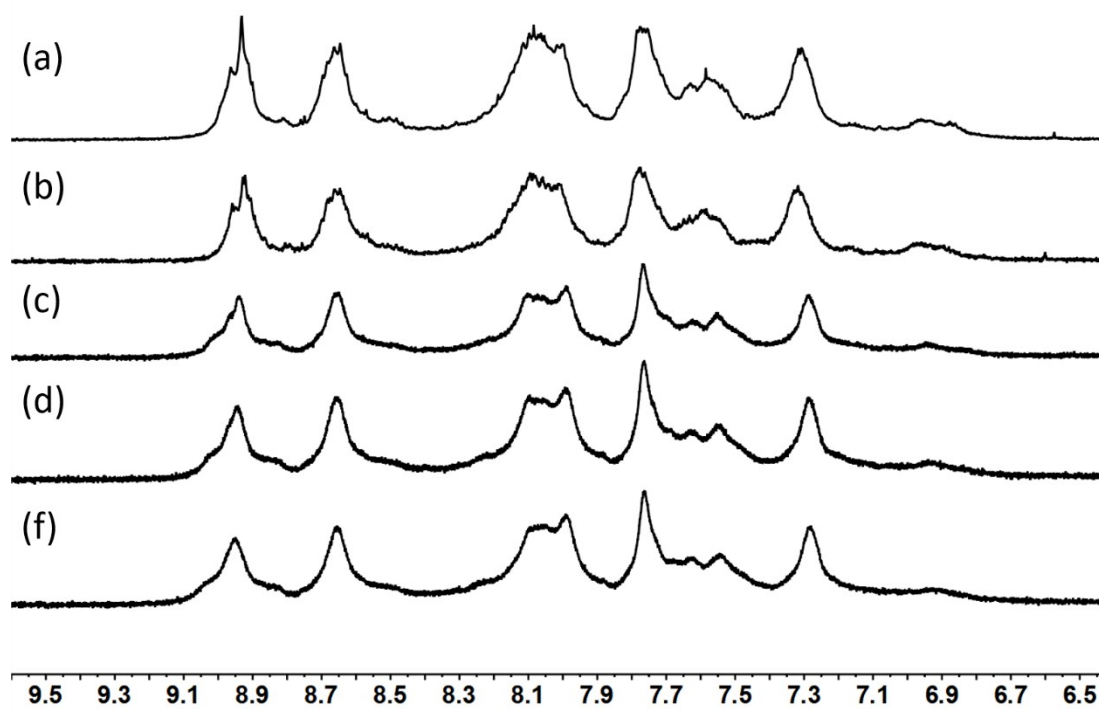

**Figure S13.**  $^1\text{H}$  NMR spectra of supramolecular  $\text{G}[\text{NTf}_2]$  at (a) 333.15 K (b) 313.15 K (c) 253.15 K (d) 243.15 K (f) 233.15 K.

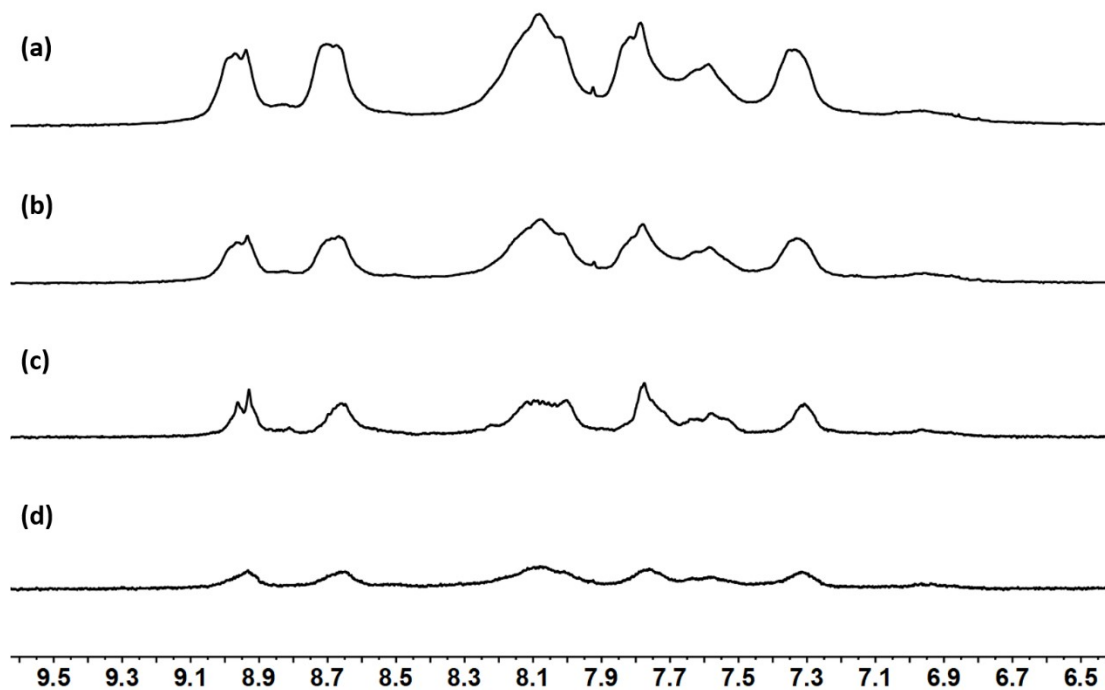

**Figure S14.**  $^1\text{H}$  NMR data at different concentrations of (a)  $1 \times 10^{-3}$  mol/L ;(b)  $5 \times 10^{-4}$  mol/L (c)  $1 \times 10^{-4}$  mol/L (d)  $1 \times 10^{-5}$  mol/L.

Concentration dependent  $^1\text{H}$  NMR of the supramolecular  $\text{G}[\text{NTf}_2^-]$  experiments were performed. The chemical shifts were not changed, indicating that the aggregation was not due to solvent effects but simple intermolecular aggregation.

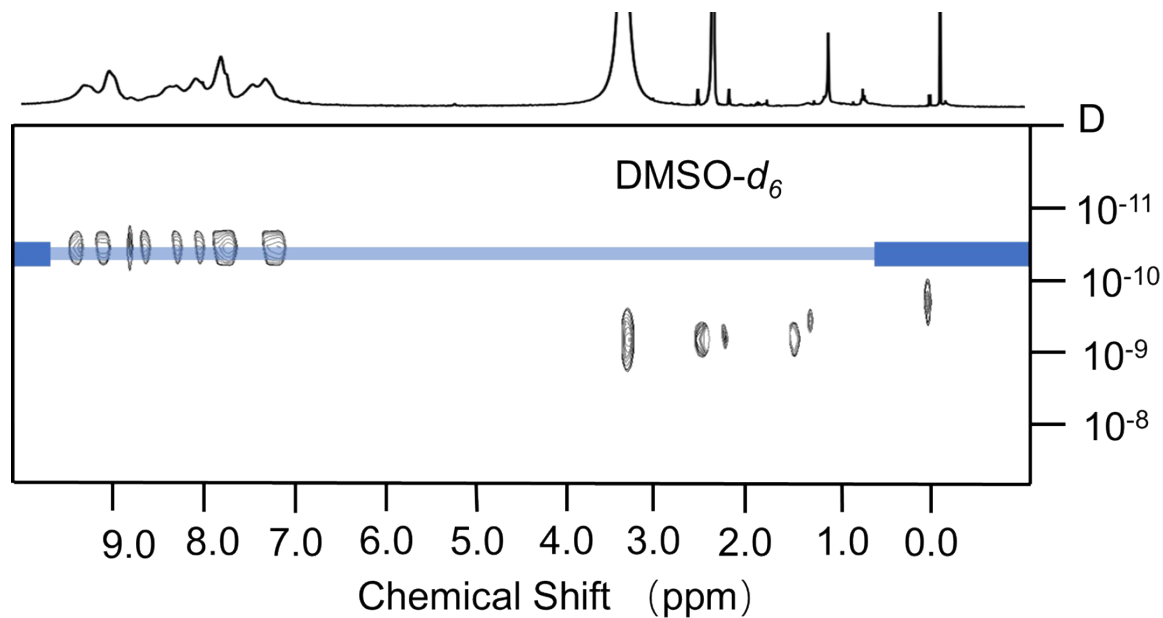

**Figure S15.** 2D  $^1\text{H}$ - $^1\text{H}$  DOSY NMR spectrum of  $\text{G}(\text{PF}_6^-)$  in  $\text{DMSO-}d_6$

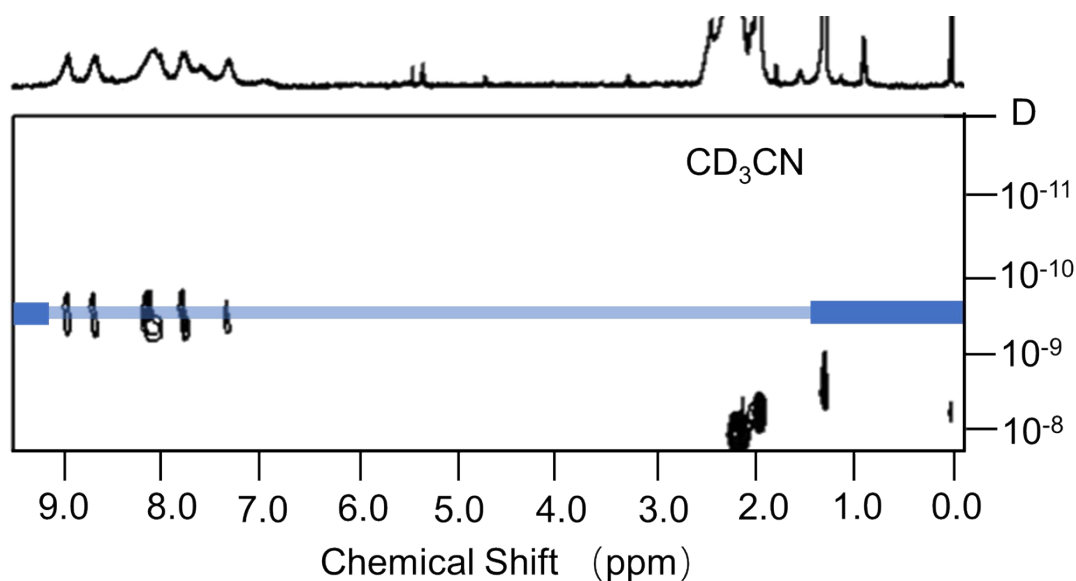

**Figure S16.** 2D  $^1\text{H}$ - $^1\text{H}$  DOSY NMR spectrum of  $\text{G}(\text{NTf}_2^-)$  in  $\text{CD}_3\text{CN}$

The sphere hydrodynamic radius can be estimated as follow according to the Stokes Einstein Equation. Where  $D$  is the diffusion constant,  $k$  is the Boltzmann's constant,  $T$  is the temperature,  $\mu$  is the viscosity of solvents, and  $R$  is the radius of the sphere-like particles:

$$D = \frac{kT}{6\pi\mu R}$$

$$D_{\text{Figure S12}} = 3.81 \times 10^{-11} \text{ m}^2 \text{ s}^{-1} \quad D_{\text{Figure S13}} = 2.69 \times 10^{-10} \text{ m}^2 \text{ s}^{-1}$$

$$k = 1.38 \times 10^{-23} \text{ N m K}^{-1}$$

$$T = 298 \text{ K}$$

$$\mu = 1.996 \times 10^{-3} \text{ N m}^{-2} \text{ s} (\text{CD}_3\text{CN})^2 \quad \mu = 3.67 \times 10^{-4} \text{ N m}^{-2} \text{ s} (\text{DMSO-}d_6)^3$$

$$r = \frac{kT}{6\pi\mu D} = 2.55 \times 10^{-9} \text{ m} = 2.55 \text{ nm}$$

$$r = \frac{kT}{6\pi\mu D} = 2.22 \times 10^{-9} \text{ m} = 2.22 \text{ nm}$$

The radius of the spherical G is 5.1 nm and 4.5 nm, which is consistent with the result of computer modeling.

#### 4. ESI-MS Spectra

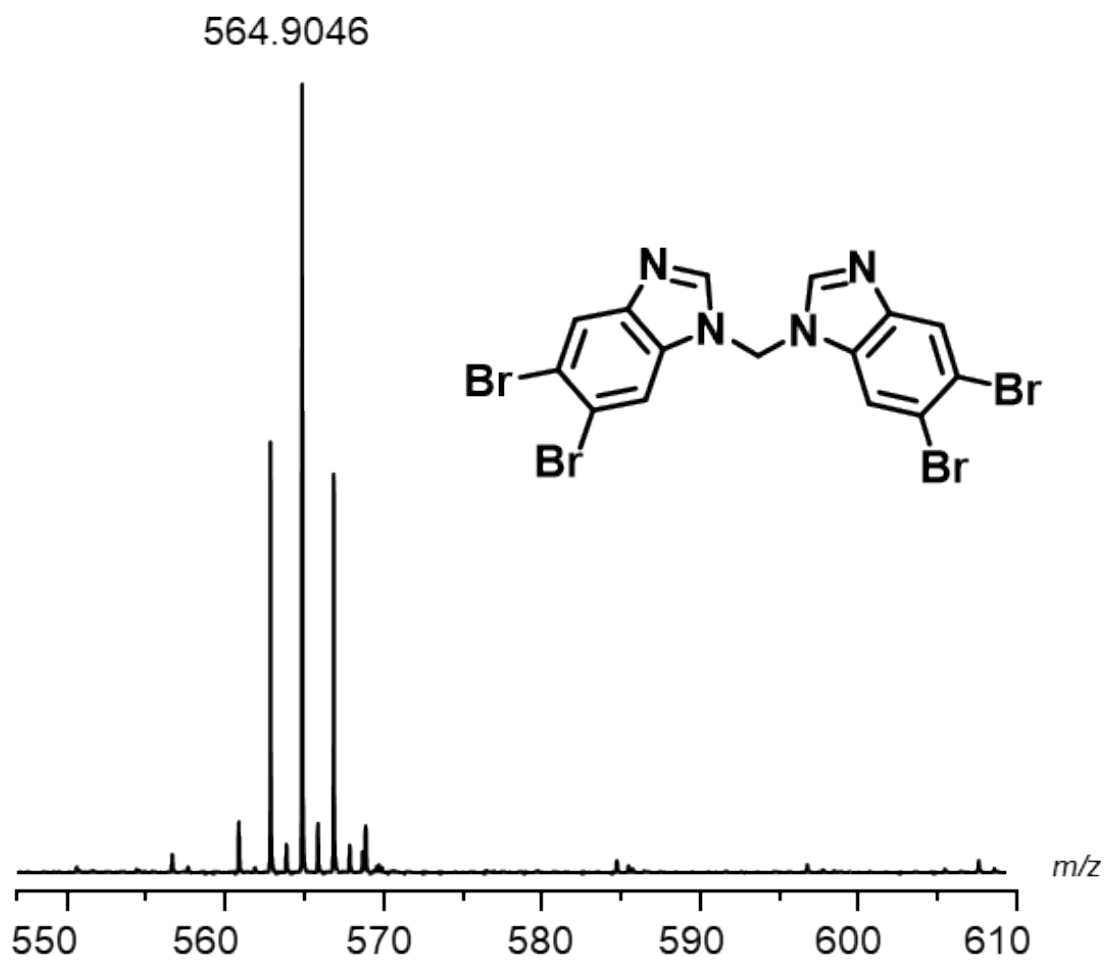

Figure S17. ESI-MS of 2a

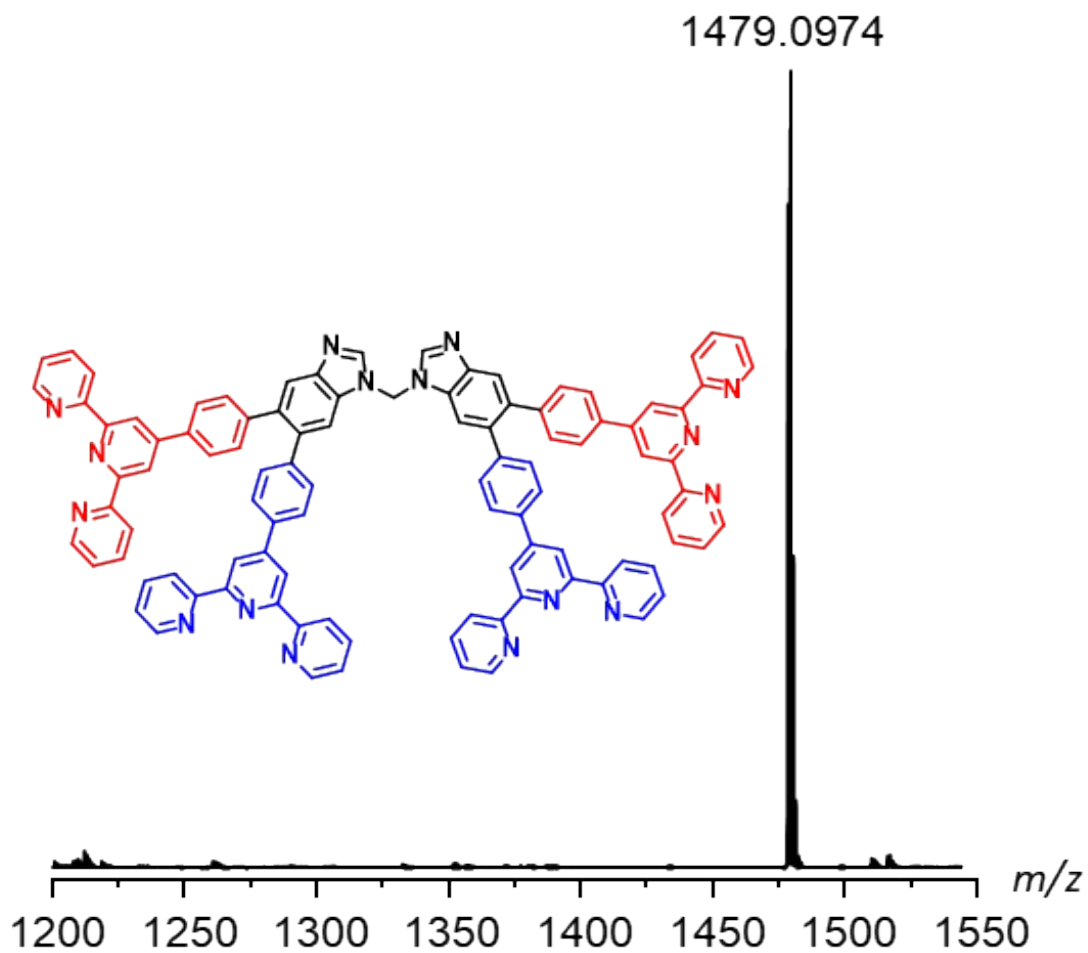

Figure S18. ESI-MS of L

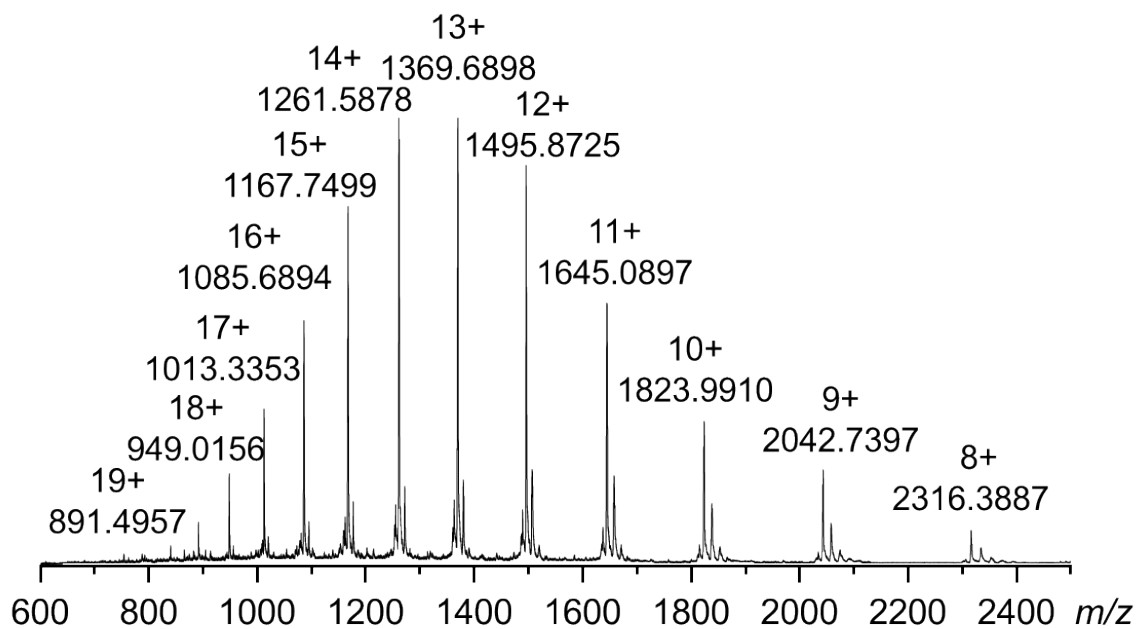

Figure S19. ESI-MS of truncated trigonometric column  $G(PF_6^-)$

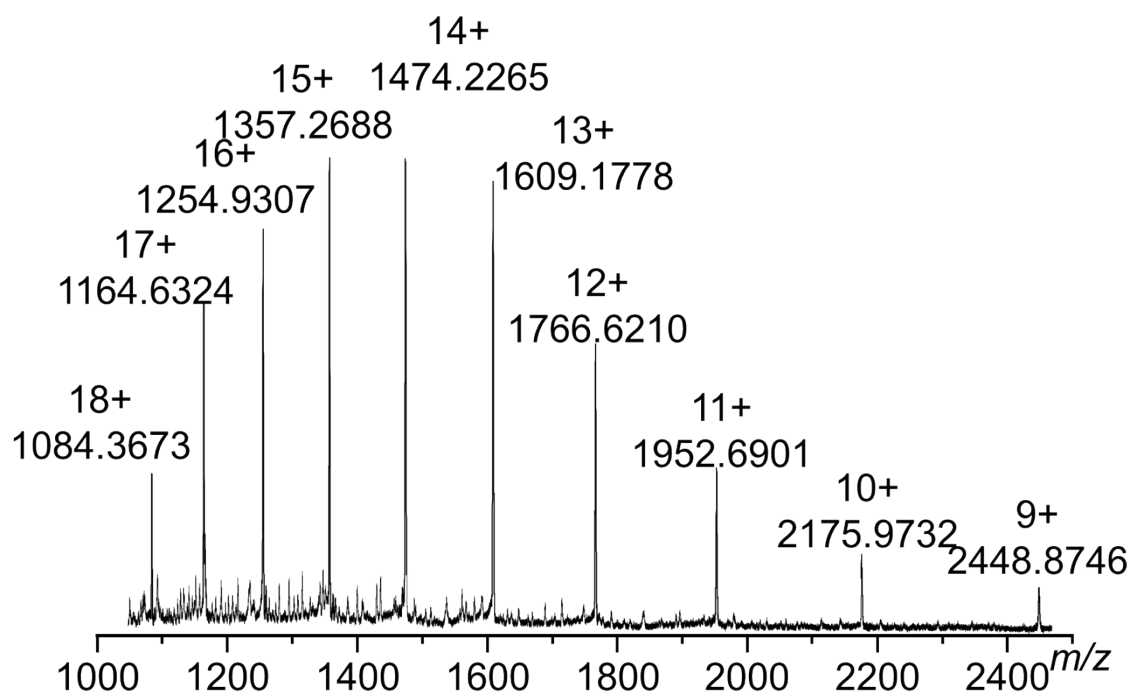

Figure S20. ESI-MS of truncated trigonometric column  $G(NTf_2^-)$

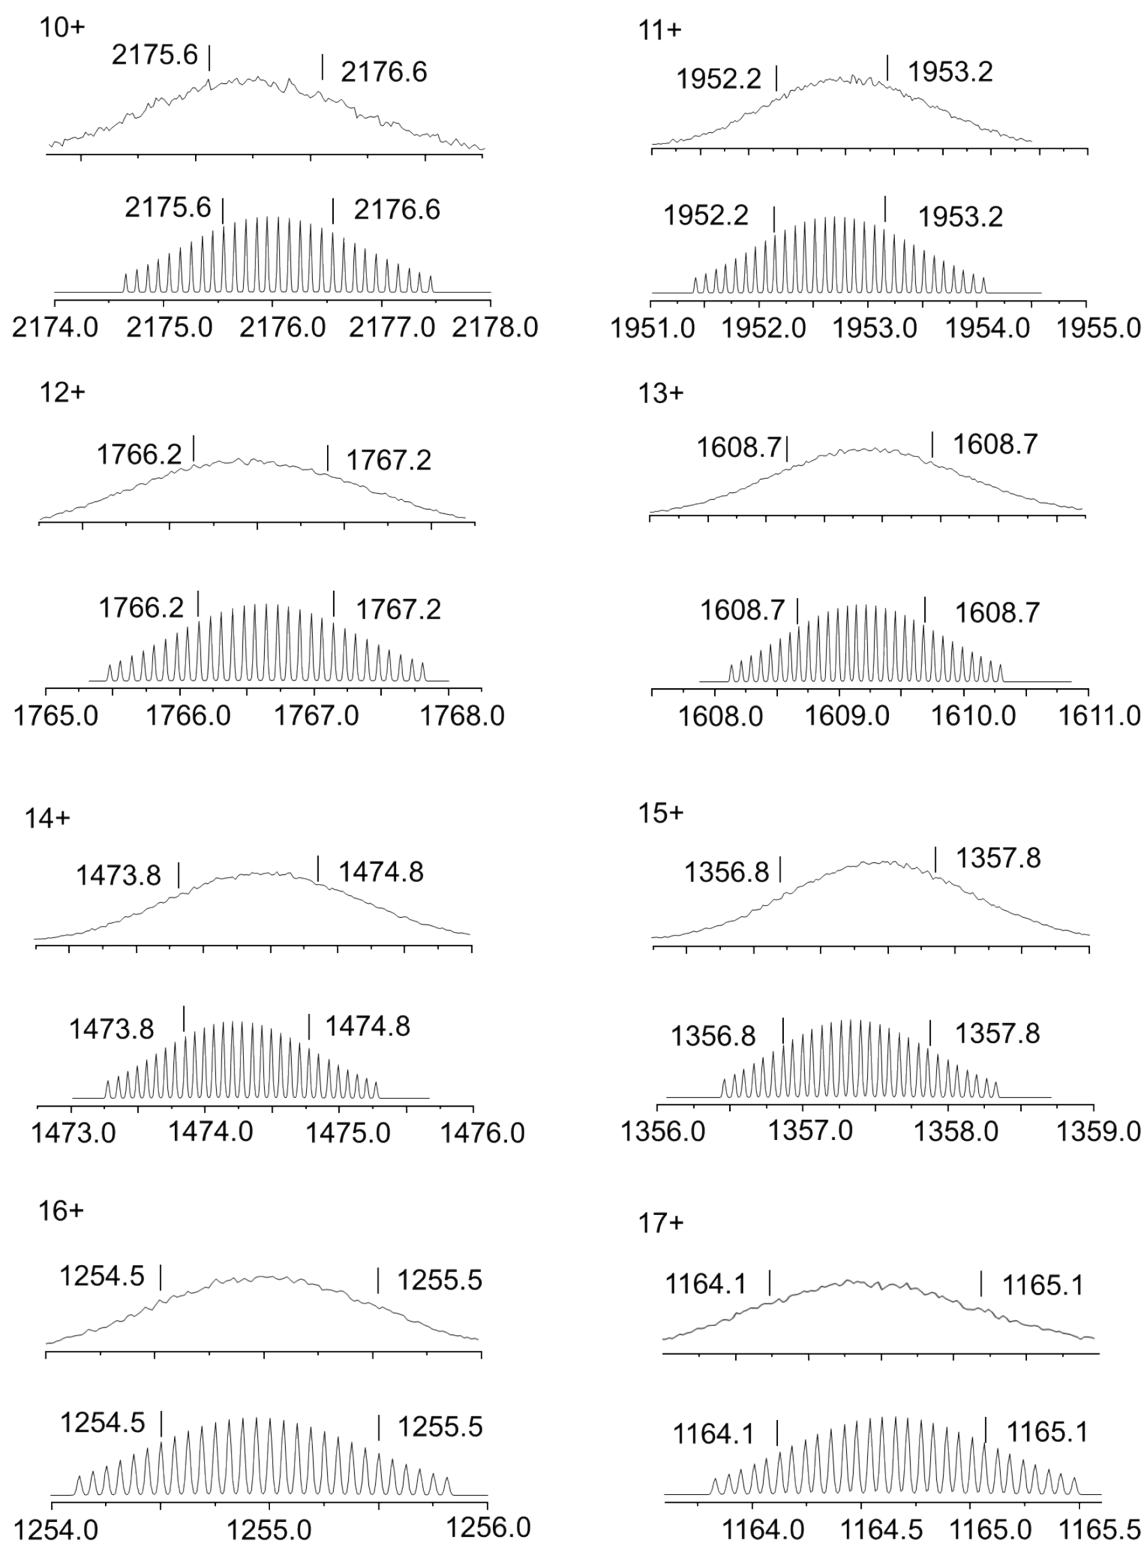

**Figure S21.** Simulated (top) and experimental (bottom) isotope patterns for different charge states observed from  $G(\text{NTF}_2^-)$ .

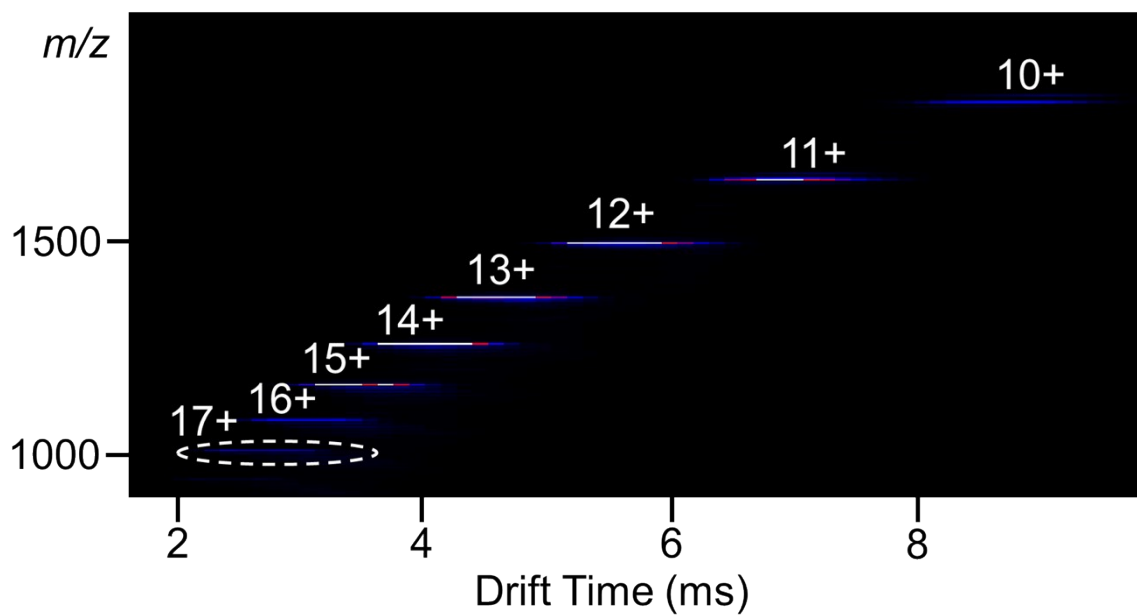

Figure S22. 2D ESI-IM-MS plot ( $m/z$  vs drift time) of  $G(PF_6^-)$ .

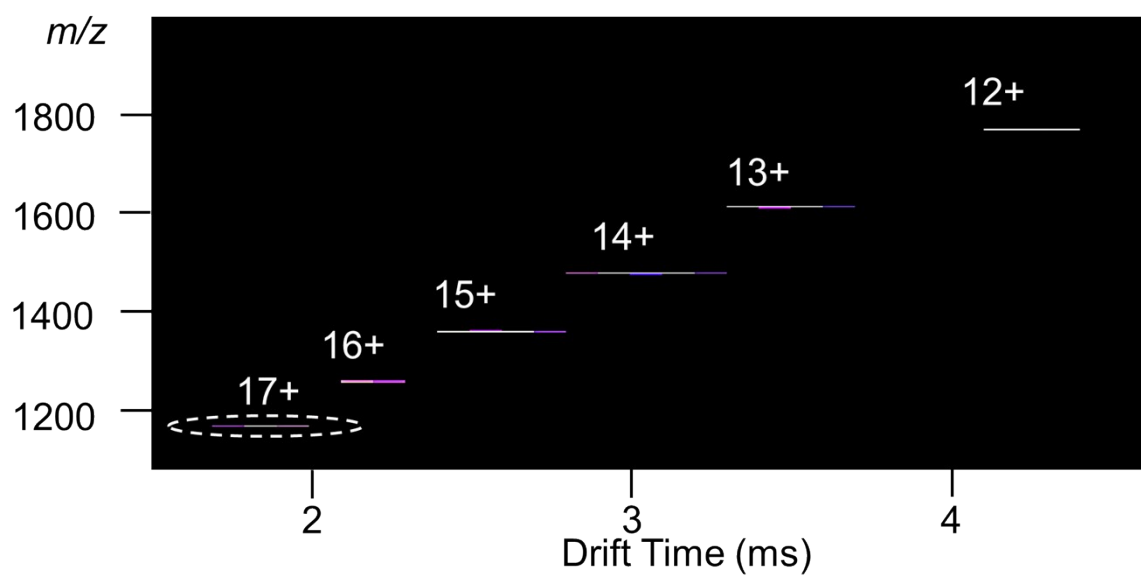

Figure S23. 2D ESI-IM-MS plot ( $m/z$  vs drift time) of  $G(NTf_2^-)$ .



## 5. Fluorescence emission measurement

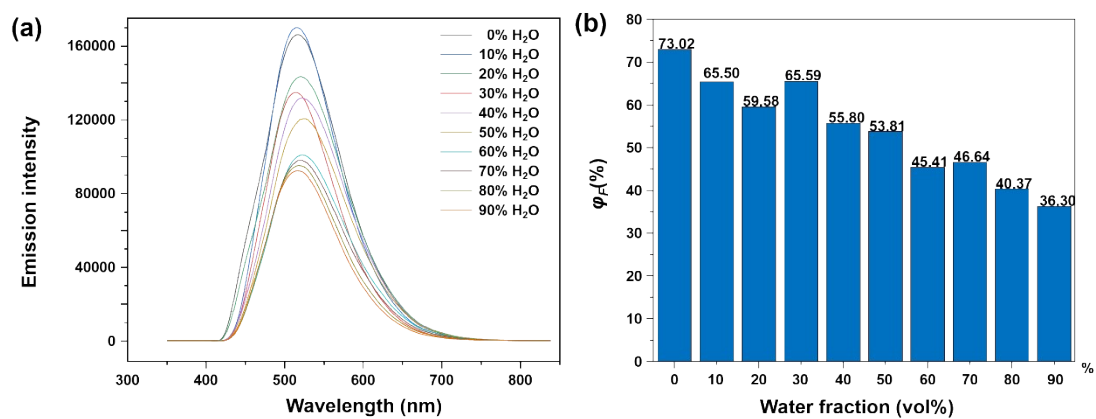

Figure S24. (a) Fluorescence spectra of G[PF<sub>6</sub><sup>-</sup>]. ( $\lambda_{\text{ex}} = 320 \text{ nm}$ ,  $c = 1.0 \mu\text{M}$ ). (b) Quantum yields of G[PF<sub>6</sub><sup>-</sup>].

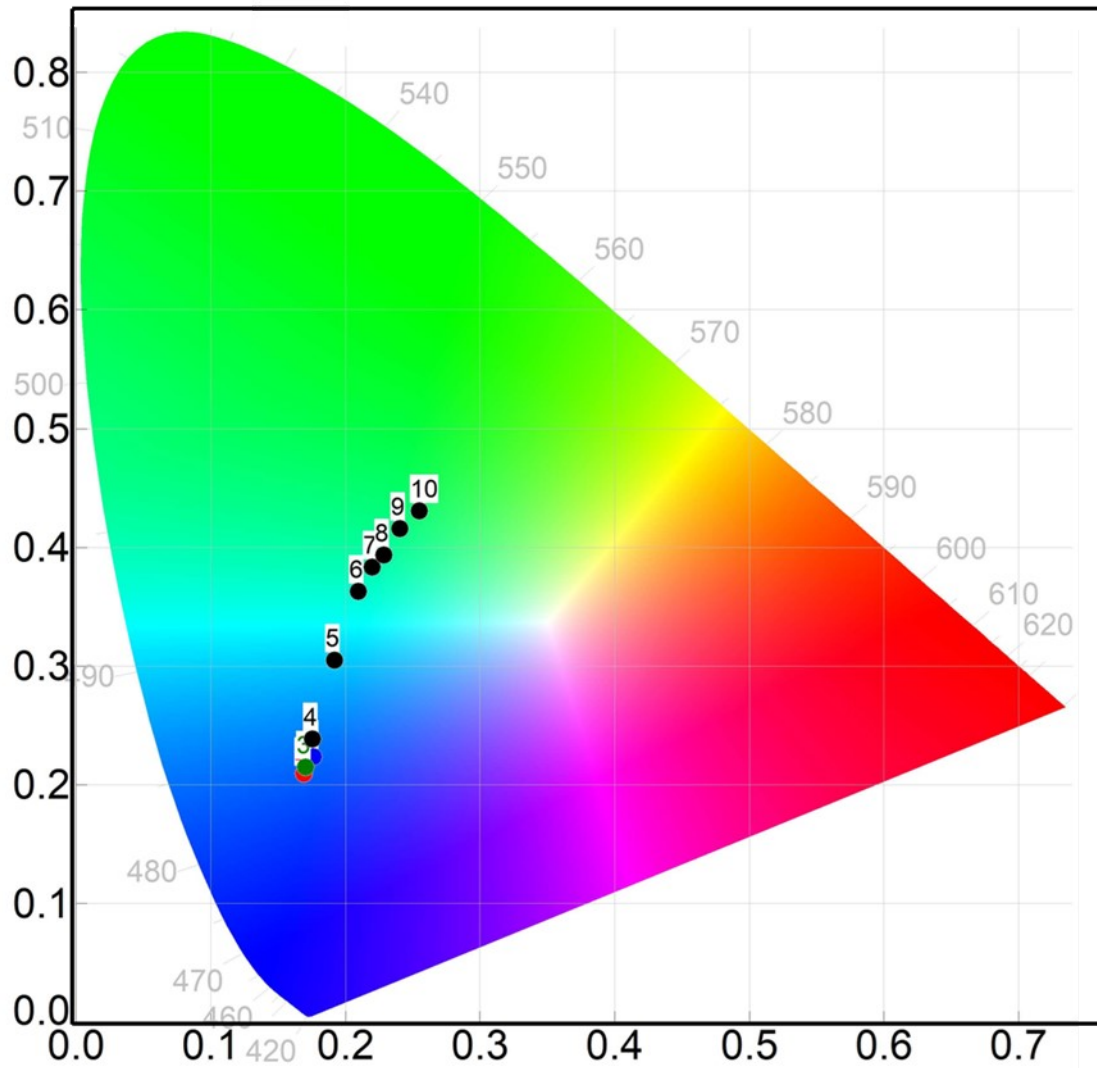

Figure S25. CIE 1931 chromaticity diagram of L

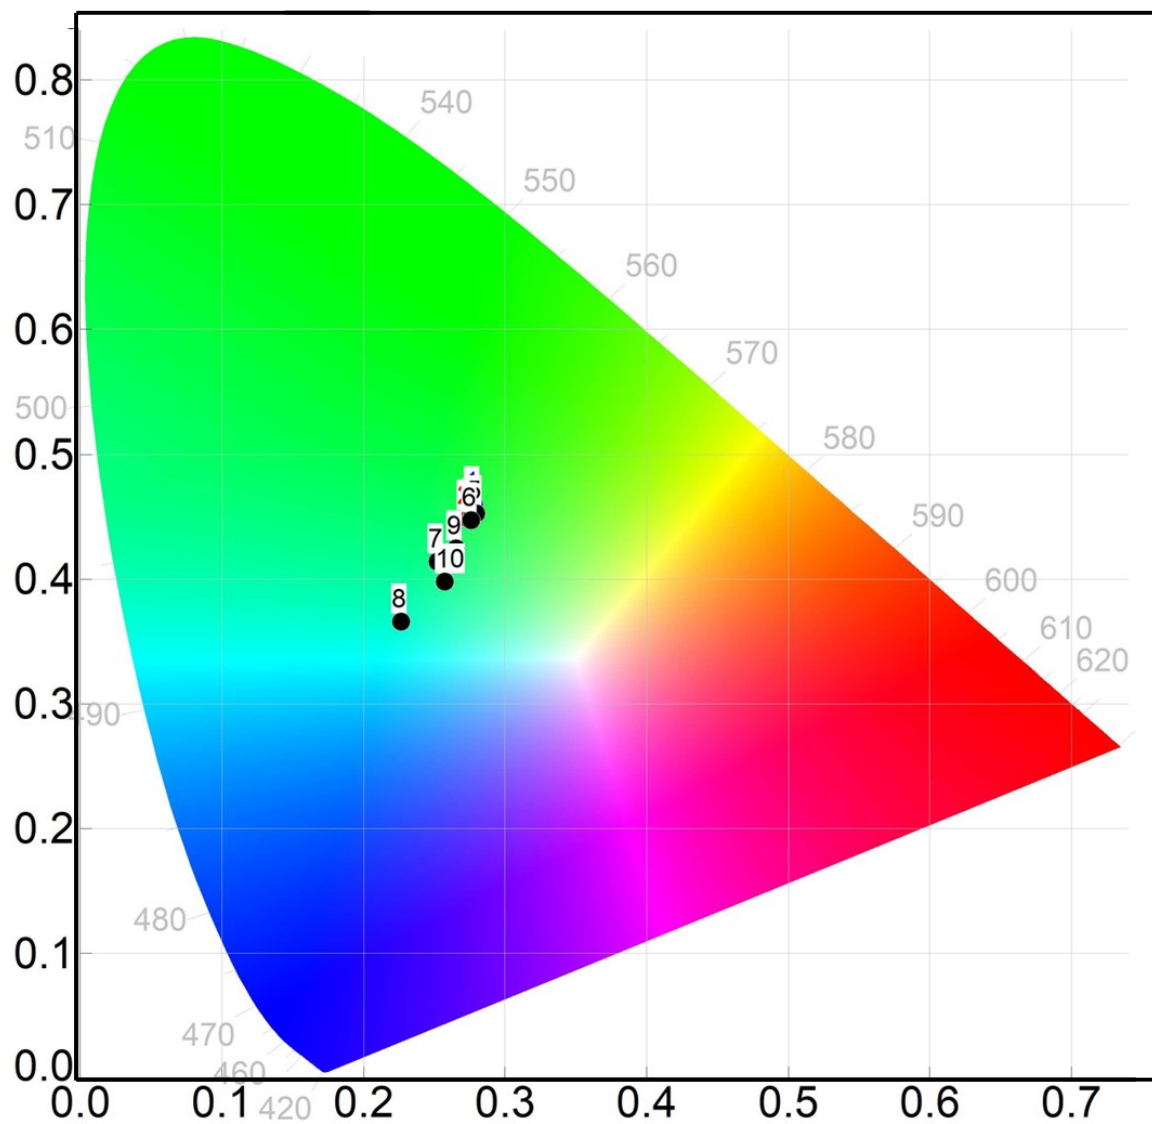

Figure S26. CIE 1931 chromaticity diagram of supramolecular G(NTf<sub>2</sub>).

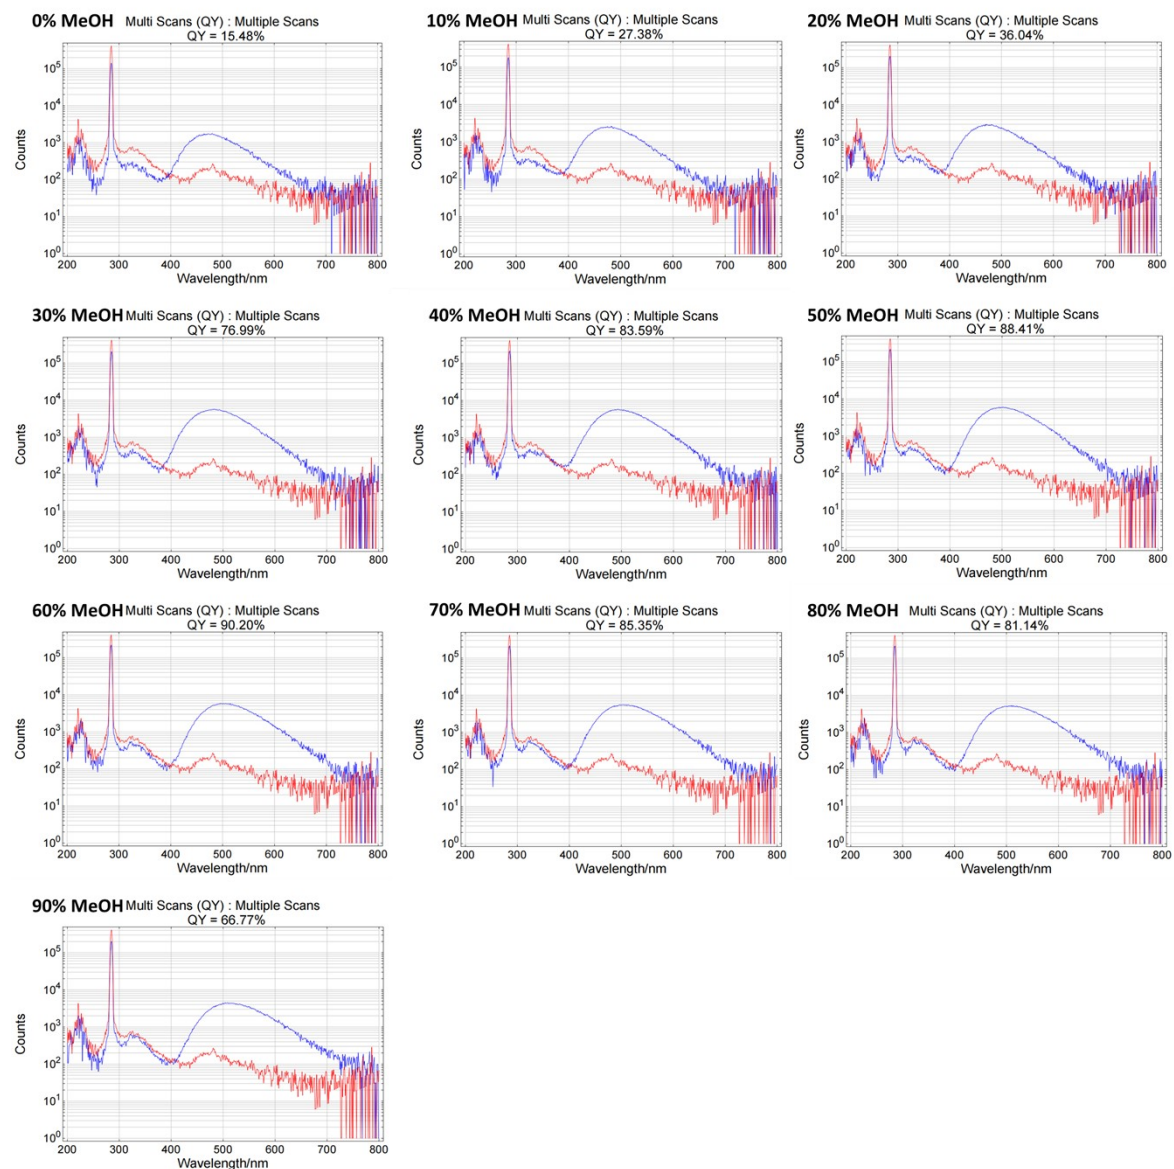

Figure S27. Fluorescence quantum yield of L (0%-90% MeOH).

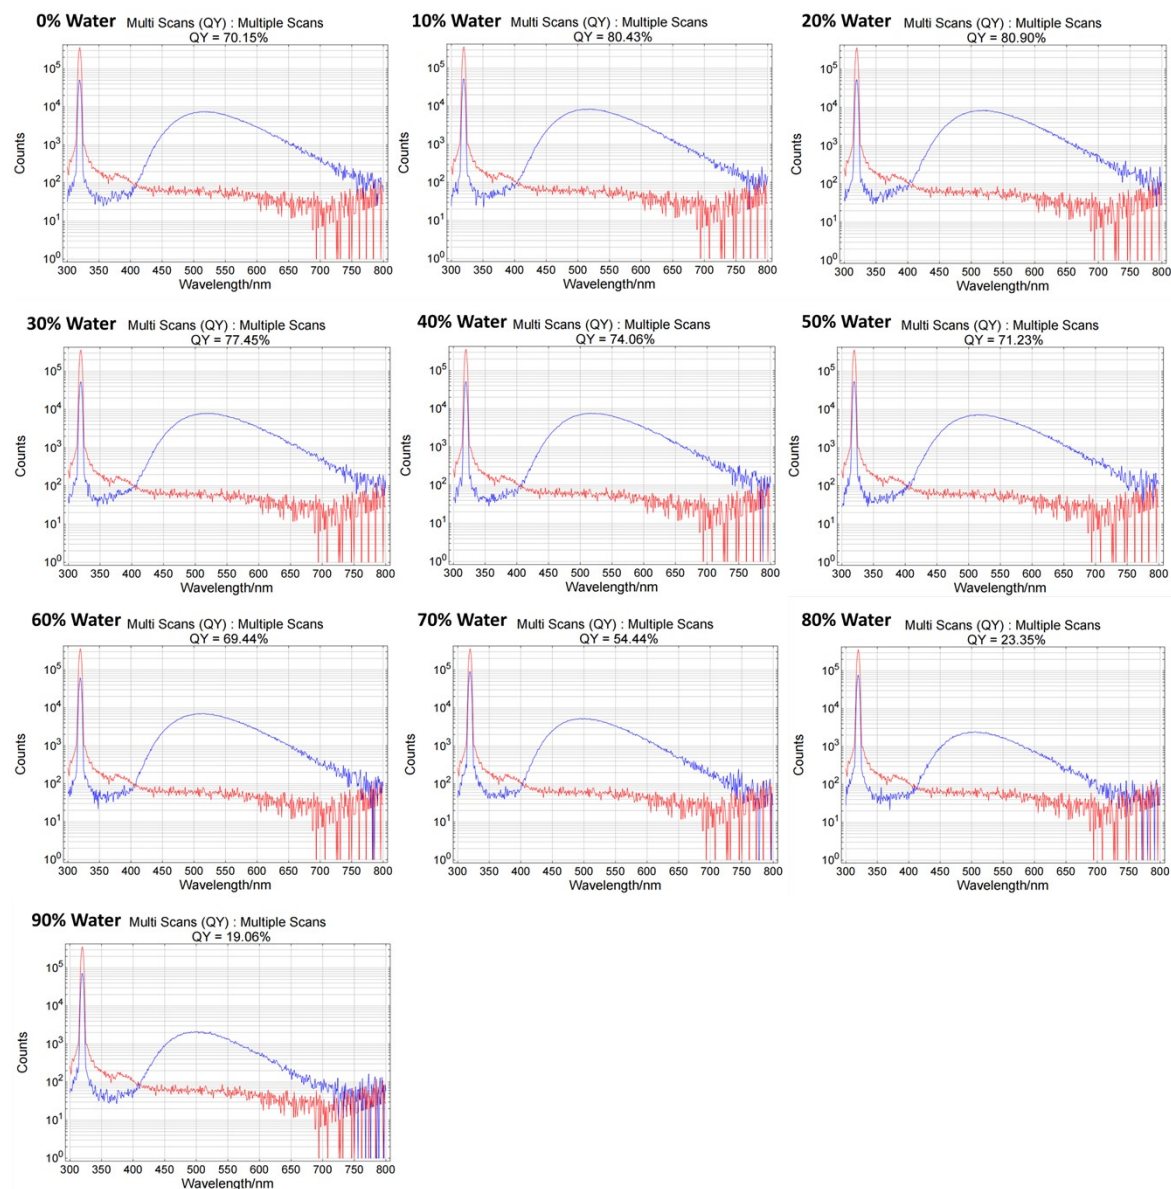

Figure S28. Fluorescence quantum yield of  $G(\text{NTf}_2^-)$  (0%-90%  $\text{H}_2\text{O}$ ).

## 6. References

1. Y.-T. Chan, X. Li, J. Yu, G. A. Carri, C. N. Moorefield, G. R. Newkome and C. Wesdemiotis, *J Am Chem Soc*, 2011, **133**, 11967-11976.
2. H. Lee, R. M. Venable, A. D. MacKerell and R. W. Pastor, *Biophys. J.* 2008, **95**, 1590-1599.
3. D. S. Gill, H. Anand and J. K. Puri, *Z. Naturforsch* 2004, **59**, 615-620.
